# Supplementary material for: Histopathologic image–based deep learning classifier for predicting platinum-based treatment responses in high-grade serous ovarian cancer
Source: PubMed Central journal article supplement (PMC11102549; doi:10.1038/s41467-024-48667-6), 2024-05-18
Supplement: 41467_2024_48667_MOESM1_ESM.pdf [file 41467_2024_48667_MOESM1_ESM.pdf]

1 **Supplementary Data**

2 **Histopathologic Image-based Deep Learning Classifier for Predicting Platinum-based**  
3 **Treatment Responses in High-grade Serous Ovarian Cancer**

4 Byungsoo Ahn, Damin Moon, Hyun-Soo Kim, Chung Lee, Nam Hoon Cho, Heung-Kook  
5 Choi, Dongmin Kim, Jung-Yun Lee, Eun Ji Nam, Dongju Won, Hee Jung An, Sun Young  
6 Kwon, Su-Jin Shin, Hye Ra Jung, Dohee Kwon, Heejung Park, Milim Kim, Yoon Jin Cha,  
7 Hyunjin Park, Yangkyu Lee, Songmi Noh, Yong-Moon Lee, Sung-Eun Choi, Ji Min Kim,  
8 Sun Hee Sung, Eunhyang Park\*

9 Corresponding author E-mail address: [epark54@yuhs.ac](mailto:epark54@yuhs.ac)

10

11

**a Automated cancer segmentation**

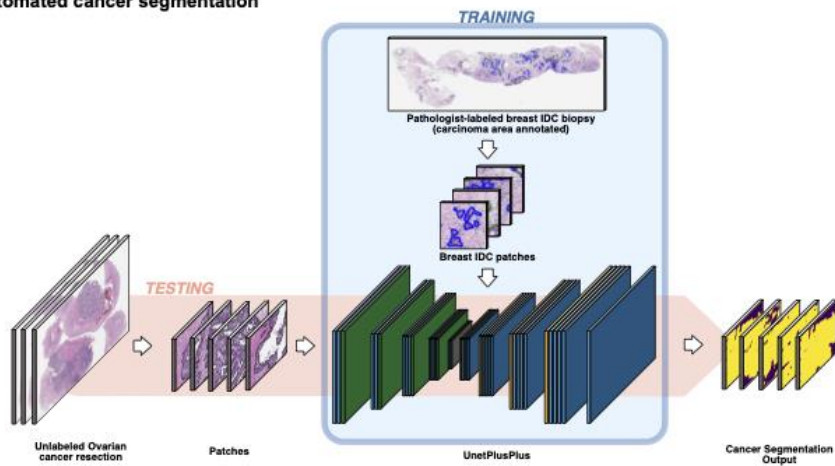

**b**

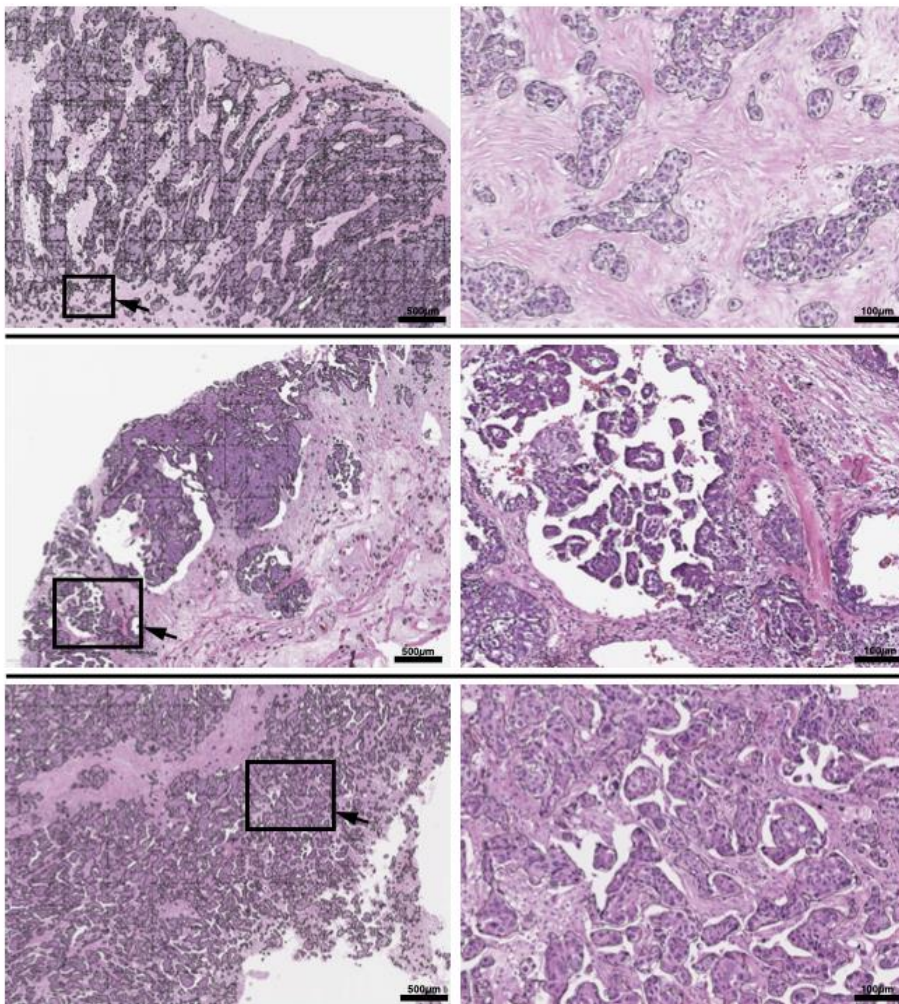

12

13 **Supplementary Figure 1. Automated cancer segmentation model.**

14 a, For the cancer-segmented area, the UNetPlusPlus model, which had been pre-trained on  
15 pathologist-labeled breast invasive ductal carcinoma for cancer segmentation, was used to  
16 label patches from the ovarian cancer resection whole slide images. b, Representative images  
17 of automated cancer segmentation (left: low-magnification, right: high-magnification).



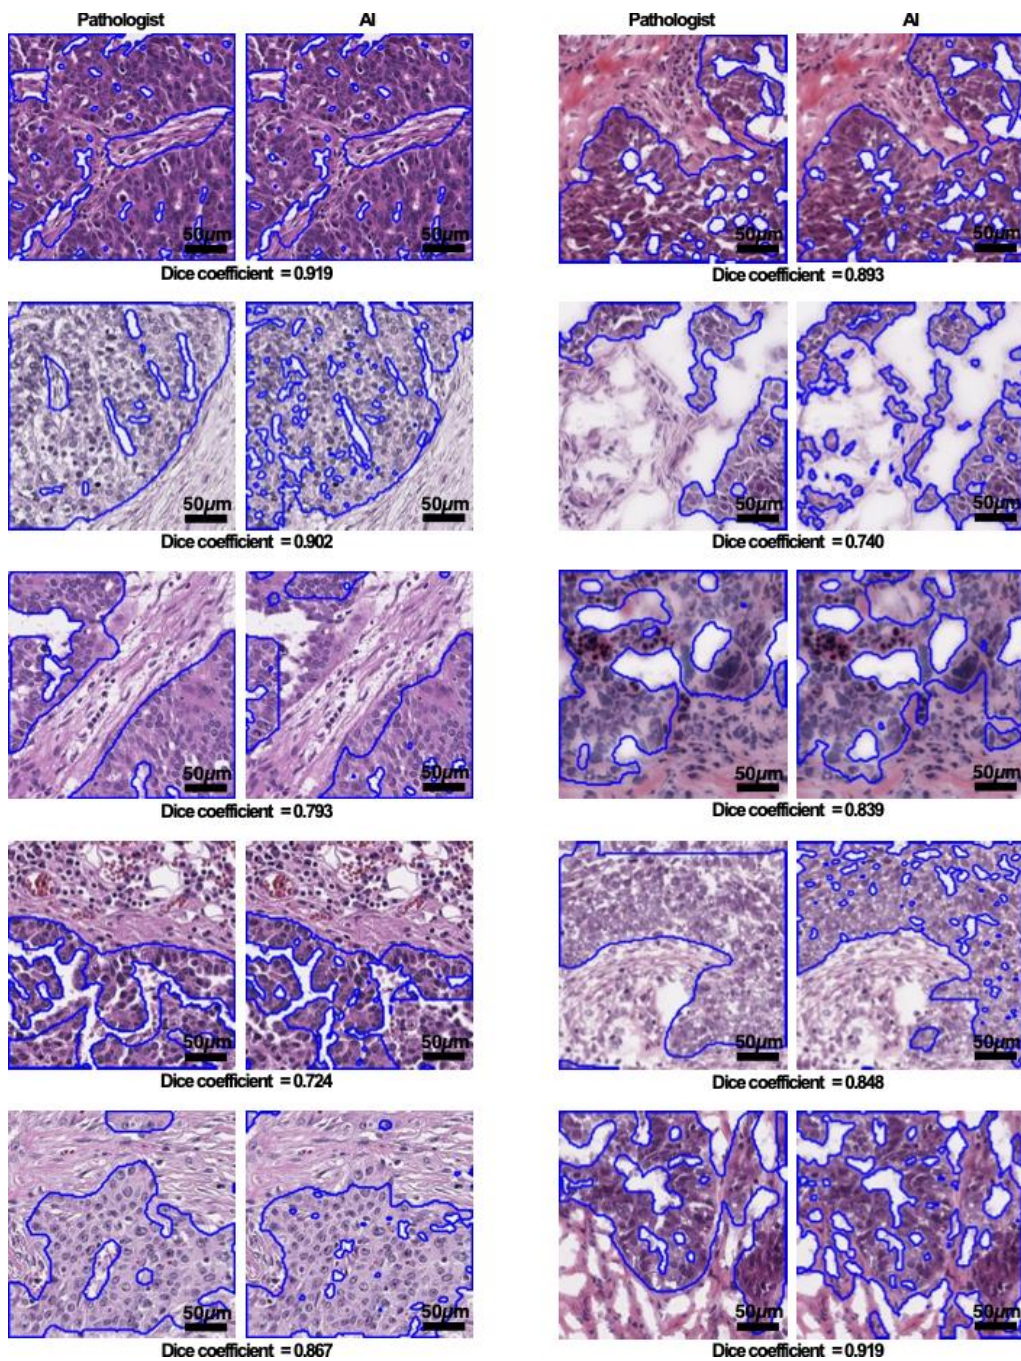

19

20 **Supplementary Figure 2. Automated cancer segmentation model validation with**  
 21 **concordance analysis between the pathologist-annotated area and the model's cancer**  
 22 **segmented area.**

23 10% of the cases from the internal (SEV) and external (TCGA) cohorts were randomly  
 24 selected, and 250 x 250 µm regions from the whole slide images were manually annotated by  
 25 experienced gynecologic pathologists. Side-by-side comparisons between the pathologists'  
 26 and automated cancer segmentation model's areas are shown with the corresponding Dice  
 27 coefficients.

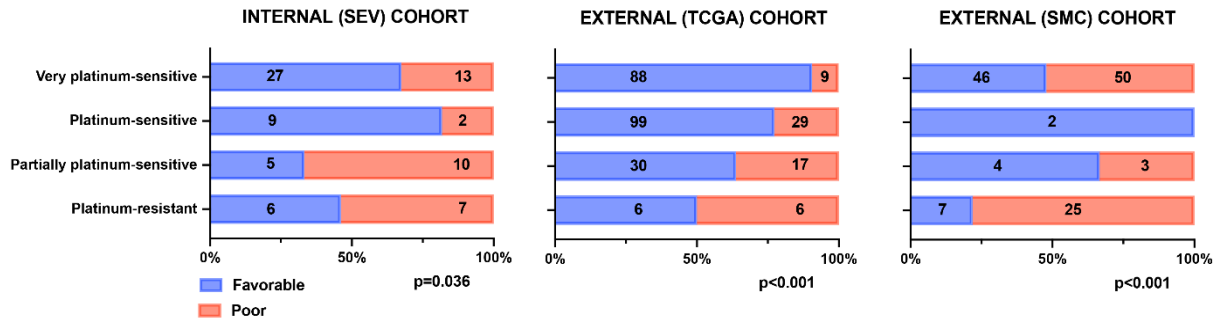

28

29 **Supplementary Figure 3. Distribution of PathoRiCH prediction results across three**  
 30 **different cohorts: the internal (SEV) and external (TCGA and SMC).**

31 The distribution of PathoRiCH prediction outcomes for three patient cohorts—internal (SEV)  
 32 and external (TCGA and SMC) cohorts, broken down into four ground truth PFI groups:  
 33 platinum resistant (PFI ≤6 months), partially platinum resistant (6–12 months), platinum  
 34 sensitive (12–24 months), and very platinum sensitive (>24 months). The colored bars  
 35 indicate the percentage of predictions for each outcome group (blue for favorable and red for  
 36 poor), with numerical values within each bars showing the case count for each category. The  
 37 predictions for all three cohorts showed significantly different distributions for the four PFI  
 38 groups ( $p = 0.035$ ,  $p < 0.001$  and  $p < 0.001$  respectively).

39

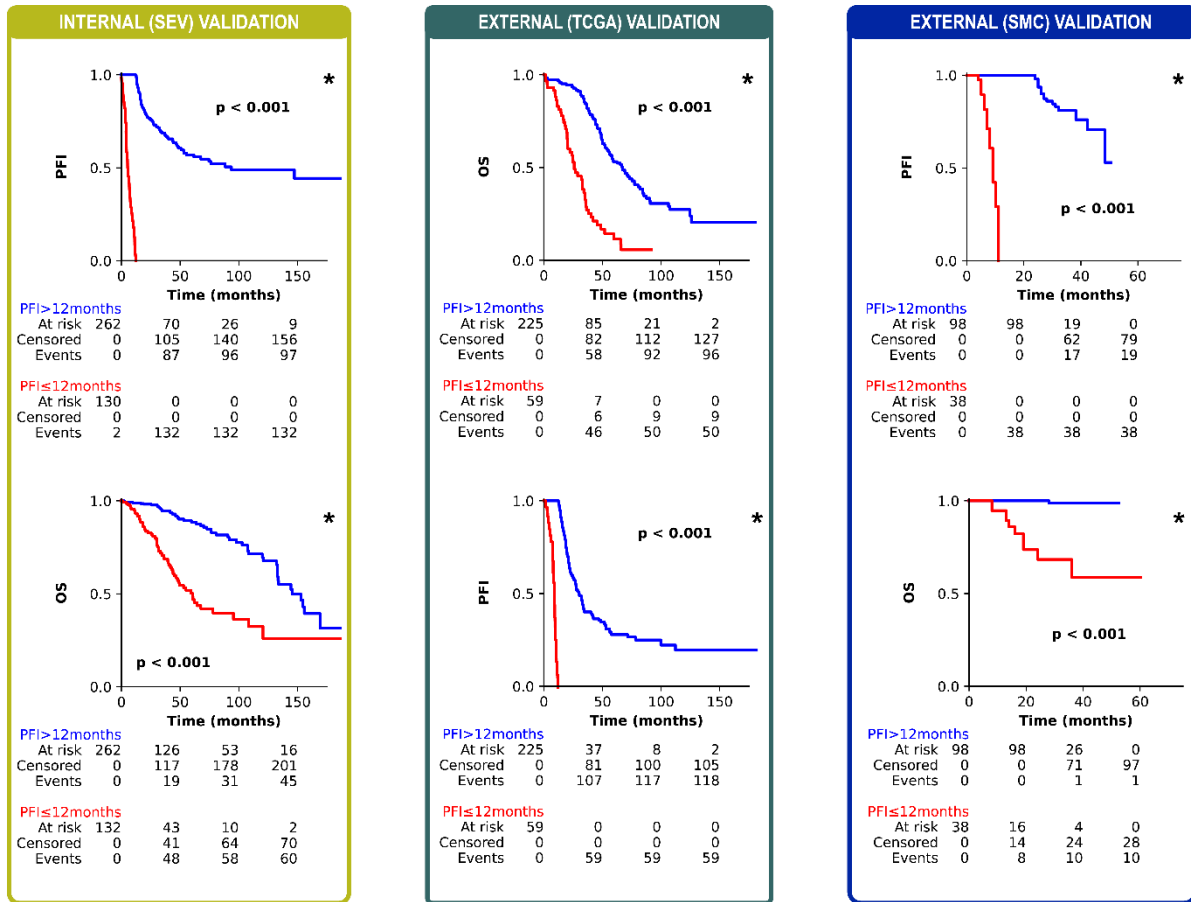

\* Marked if p-value < 0.05

40  
 41 **Supplementary Figure 4. Kaplan-Meier survival analysis plots depicting ground truth**  
 42 **favorable and poor groups in three different cohorts: the internal (SEV) and external**  
 43 **(TCGA and SMC).**  
 44 All three cohorts displayed statistically significant patient stratification for both the platinum-  
 45 free interval (PFI) and overall survival (OS) ( $p < 0.001$  for all analyses).  
 46

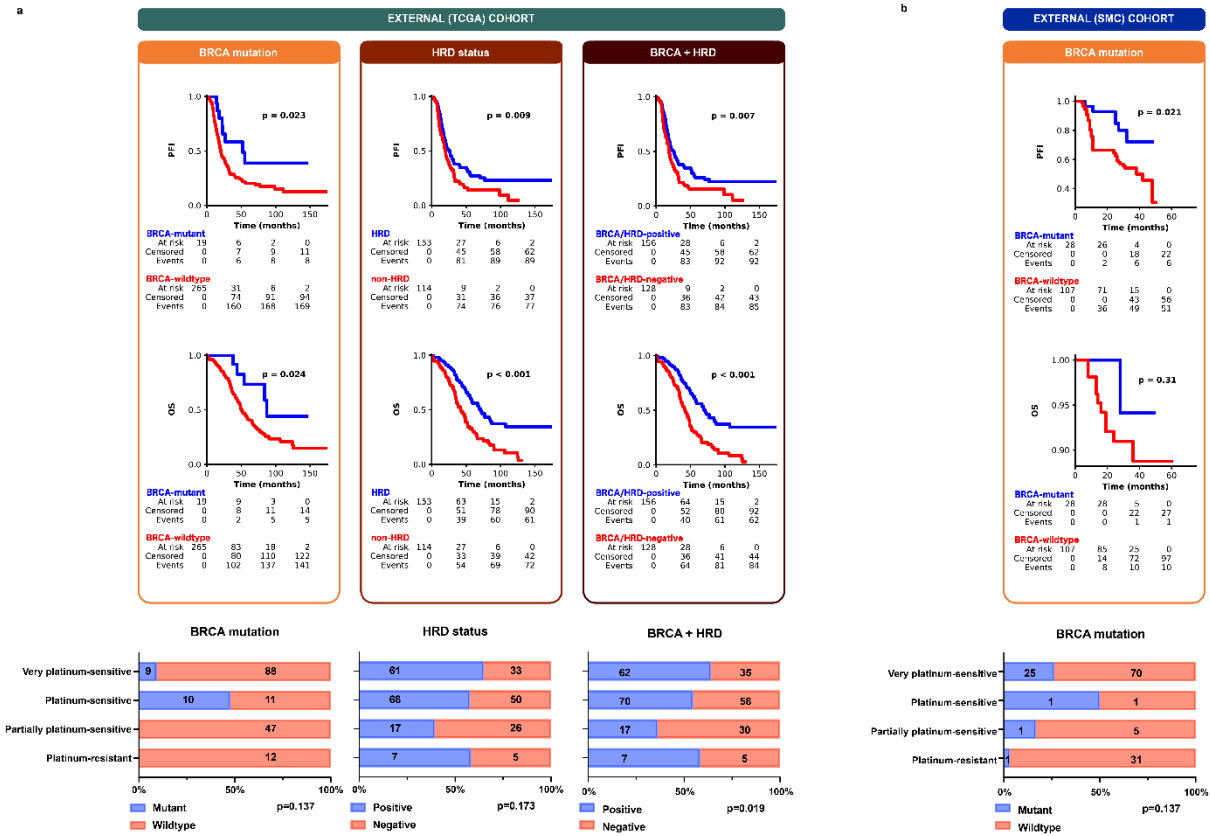

47

48 **Supplementary Figure 5. The Kaplan-Meier plots and distributions of the four PFI**  
 49 **groups according to *BRCA* mutation, HRD status, and combined *BRCA* and HRD status**  
 50 **in the external (TCGA and SMC) cohorts.**

51 **a**, Kaplan-Meier survival plots of external TCGA cohort patients categorized by their *BRCA*  
 52 mutation status, HRD status, and combined *BRCA* and HRD status. All factors demonstrated  
 53 significant stratification for favorable and poor prognostic groups in terms of PFI ( $p = 0.023$ ,  
 54  $p = 0.009$ , and  $p = 0.007$ , respectively) and OS ( $p = 0.024$ ,  $p < 0.001$ , and  $p < 0.001$ ,  
 55 respectively). Accompanying bar graphs below depicted the percentage of patients across  
 56 four PFI groups within the TCGA cohort, stratified by *BRCA* mutation, HRD status, and  
 57 combined *BRCA* and HRD status. A statistical difference in distribution was only seen in  
 58 combined *BRCA* and HRD status ( $p = 0.019$ ).

59 **b**, The external SMC cohort's survival analysis showed significant stratification based on  
 60 *BRCA* mutation status for PFI ( $p = 0.021$ ), but not for OS ( $p = 0.31$ ). The associated bar  
 61 graph showed the patient distribution across four PFI categories based on *BRCA* mutation  
 62 status, which did not provide a significant distinction between the groups ( $p = 0.137$ ).

63

64



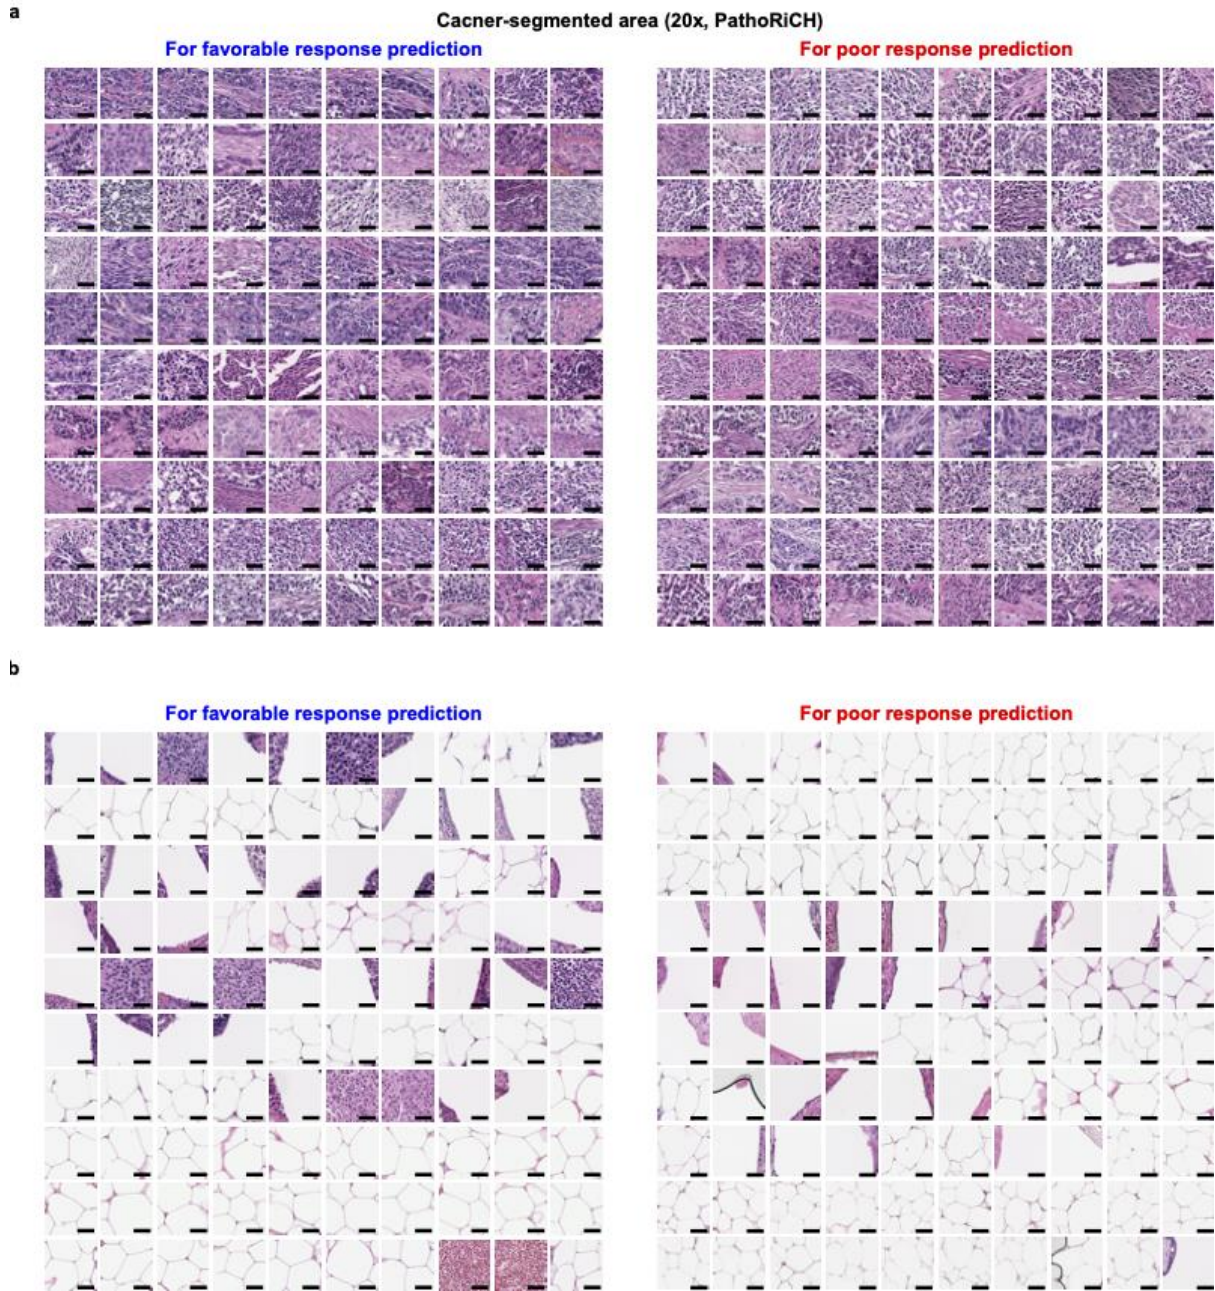

65

66 **Supplementary Figure 6. The top 100 patches for the favorable and poor response**  
 67 **groups predicted by PathoRiCH and the all-tissue area 20× magnification model.**

68 (Scale bar = 50µm for all patch images) **a.** Top 100 patches for the PathoRiCH-predicted

69 favorable and poor response groups. **b.** Top 100 patches for the favorable and poor response

70 groups determined by the all-tissue area 20× magnification model.

71

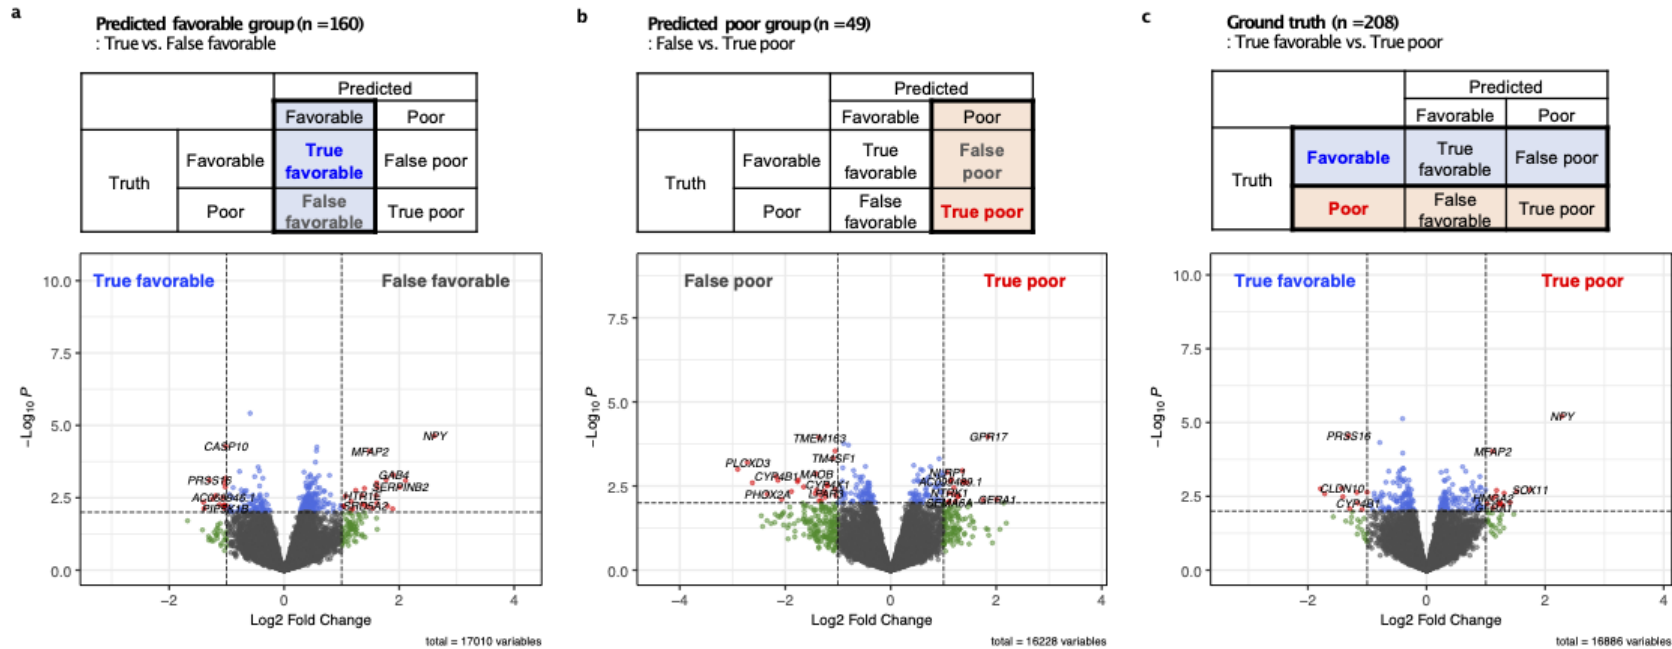

72

73 **Supplementary Figure 7. Volcano plots of the PathoRiCH-predicted and actual ground truth response groups.**

74 **a.** Favorable-predicted group, contrasting between true and false predictions. **b.** Poor-predicted group, showing expression differences

75 between false and true predictions. **c.** Ground truth data, distinguishing true favorable and true poor groups. Horizontal dotted line: cut-off of

76  $p < 0.01$ , vertical dotted line: cut-off of absolute  $\log_2$  fold change  $> 1$ .

77



Ground truth (n =208)

: True favorable vs. True poor

|       |           | Predicted       |            |
|-------|-----------|-----------------|------------|
|       |           | Favorable       | Poor       |
| Truth | Favorable | True favorable  | False poor |
|       | Poor      | False favorable | True poor  |

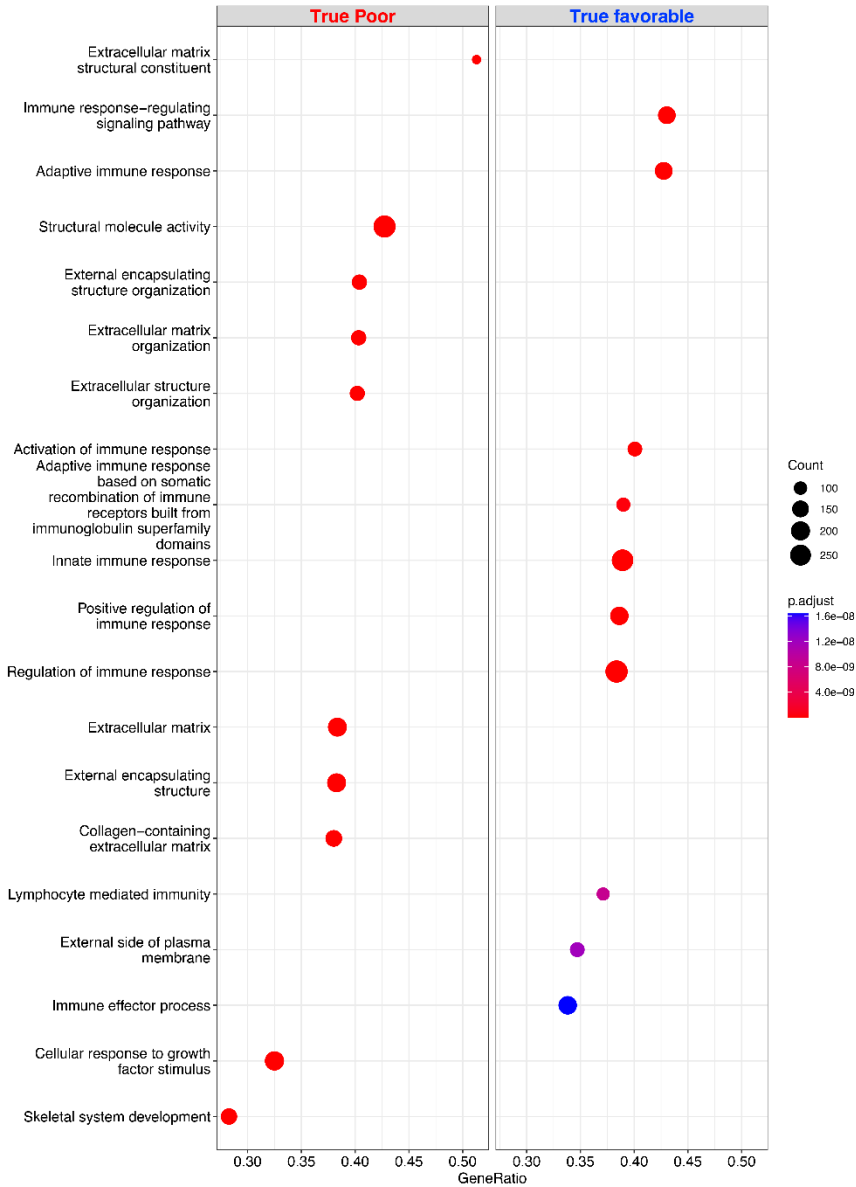

78

79 **Supplementary Figure 8. Differential gene ontology (GO) profiles comparing the true**  
 80 **favorable-response and true poor-response groups.**

81 The confusion matrix highlights the true favorable and true poor groups. The GO biological  
 82 process analysis reveals that the true favorable group is predominantly enriched in immune  
 83 response–related genes, whereas the true poor group predominantly features genes involved

84 in extracellular matrix-associated processes. ClusterProfiler<sup>1</sup> with a Benjamini–Hochberg  
85 procedure was used for GO analysis.  
86

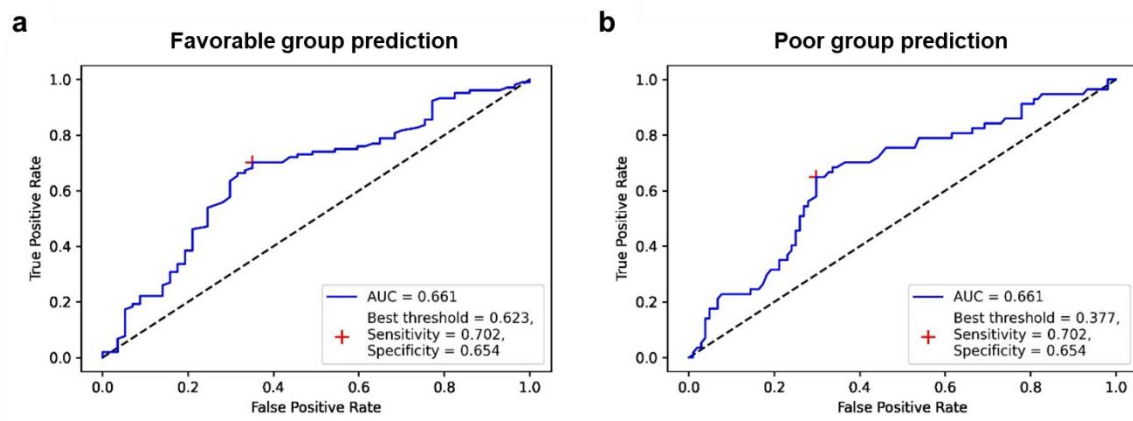

88

89 **Supplementary Figure 9. Receiver operating characteristic curves of the Youden's**  
90 **Index for identifying the thresholds for favorable and poor response groups**

91 **a**, For predicting favorable response group, 0.623 was identified as the optimal threshold. **b**,

92 For predicting poor response group, 0.377 was identified as the optimal threshold.

93

94 **Supplementary Table 1. Cancer segmentation concordance between pathologists and**  
95 **cancer segmentation model**

|                    | Dice coefficient<br>(Mean) |
|--------------------|----------------------------|
| SEV cohort (n=39)  | 0.781                      |
| TCGA cohort (n=29) | 0.836                      |
| Overall            | 0.804                      |

96  
97



98 **Supplementary Table 2. Performance of cancer-segmented area multiple instance learning models and ensemble analyses for the**  
 99 **internal (SEV) and external (TCGA) validation cohorts**

|                                      |                      | Cancer-segmented area |               |               |                          |                                   |                                  |
|--------------------------------------|----------------------|-----------------------|---------------|---------------|--------------------------|-----------------------------------|----------------------------------|
|                                      |                      | 5×                    | 20×           | Multiscale    | Soft voting<br>(5×, 20×) | Hard voting<br>(AND)<br>(5×, 20×) | Hard voting<br>(OR)<br>(5×, 20×) |
| Internal validation<br>(SEV cohort)  | AUC-ROC*             | 0.604 ± 0.05          | 0.596 ± 0.072 | 0.614 ± 0.046 | 0.586                    | 0.635                             | 0.587                            |
|                                      | Precision            | 0.521                 | 0.465         | 0.507         | 0.424                    | 0.465                             | 0.518                            |
|                                      | Recall               | 0.468                 | 0.675         | 0.525         | 0.562                    | 0.739                             | 0.374                            |
|                                      | F1 Score             | 0.470                 | 0.522         | 0.507         | 0.483                    | 0.566                             | 0.418                            |
|                                      | K-M <i>p</i> value** | 0.000                 | 0.000         | 0.000         | 0.059                    | 0.011                             | 0.149                            |
| External validation<br>(TCGA cohort) | AUC-ROC              | 0.532                 | 0.602         | 0.573         | 0.553                    | 0.579                             | 0.578                            |
|                                      | Precision            | 0.519                 | 0.406         | 0.407         | 0.500                    | 0.398                             | 0.556                            |
|                                      | Recall               | 0.250                 | 0.528         | 0.481         | 0.245                    | 0.538                             | 0.250                            |
|                                      | F1 Score             | 0.338                 | 0.459         | 0.441         | 0.329                    | 0.457                             | 0.345                            |
|                                      | K-M <i>p</i> value** | 0.000                 | 0.032         | 0.036         | 0.000                    | 0.023                             | 0.000                            |

100 AUC-ROC, area under the receiver operating characteristic curve; K-M, Kaplan-Meier analysis (two sided)

101 \*From 5-fold cross validation; \*\*Based on platinum-free interval

102

103 **Supplementary Table 3. Clinical and molecular characteristics of the groups predicted to respond to platinum-based treatment in the**  
 104 **TCGA and SMC external validation cohorts**

|                                                  | TCGA cohort          |                |          | SMC cohort          |                |          |
|--------------------------------------------------|----------------------|----------------|----------|---------------------|----------------|----------|
|                                                  | Favorable<br>(N=223) | Poor<br>(N=61) | <i>p</i> | Favorable<br>(N=59) | Poor<br>(N=77) | <i>p</i> |
| Age                                              | 59.6 ± 11.3          | 60.6 ± 10.8    | 0.555    | 56.3 ± 8.9          | 57.4 ± 8.7     | 0.505    |
| FIGO Stage                                       |                      |                | 7.82E-04 |                     |                | 0.646    |
| Stage I                                          | 11 (5.0%)            | 1 (1.6%)       |          | 7 (11.9%)           | 5 (6.5%)       |          |
| Stage II                                         | 22 (9.9%)            | 2 (3.3%)       |          | 5 (8.5%)            | 9 (11.7%)      |          |
| Stage III                                        | 182 (82.0%)          | 45 (73.8%)     |          | 34 (57.6%)          | 43 (55.8%)     |          |
| Stage IV                                         | 7 (3.2%)             | 13 (21.3%)     |          | 13 (22.0%)          | 20 (26.0%)     |          |
| <i>BRCA</i> mutation status                      |                      |                | 0.737    |                     |                | 0.163    |
| Mutant                                           | 16 (7.2%)            | 3 (4.9%)       |          | 16 (27.1%)          | 12 (15.8%)     |          |
| Wildtype                                         | 207 (92.8%)          | 58 (95.1%)     |          | 43 (72.9%)          | 64 (84.2%)     |          |
| HRD status (Telli et al.) <sup>2</sup>           |                      |                | 0.289    |                     |                |          |
| Positive                                         | 126 (59.2%)          | 27 (50.0%)     |          |                     |                |          |
| Negative                                         | 87 (40.8%)           | 27 (50.0%)     |          |                     |                |          |
| HRD status (Takaya et al.) <sup>3</sup>          |                      |                | 0.976    |                     |                |          |
| Positive                                         | 112 (50.5%)          | 28 (49.1%)     |          |                     |                |          |
| Negative                                         | 110 (49.5%)          | 29 (50.9%)     |          |                     |                |          |
| HRD status (Perez-Villatoro et al.) <sup>4</sup> |                      |                | 0.66     |                     |                |          |
| Positive                                         | 56 (83.6%)           | 12 (75.0%)     |          |                     |                |          |
| Negative                                         | 11 (16.4%)           | 4 (25.0%)      |          |                     |                |          |

105 HRD, homologous recombination deficiency  
 106 Two-sided unpaired t-tests were used for analysis  
 107

108 **Supplementary Table 4. Univariate and multivariate survival analyses for the platinum-free interval of patients with high-grade**  
 109 **serous ovarian carcinoma in the TCGA and SMC cohorts**

| Variables                                   | Univariate |              |       |            | Multivariate |               |        |            |
|---------------------------------------------|------------|--------------|-------|------------|--------------|---------------|--------|------------|
|                                             | HR         | 95% CI       | z     | p          | HR           | 95% CI        | z      | p          |
| TCGA cohort                                 |            |              |       |            |              |               |        |            |
| Age (<60 vs. ≥60)                           | 1.148      | 0.854–1.543  | 0.914 | 0.361      | 1.08465      | 0.796–1.478   | 0.515  | 0.607      |
| Stage (I–II vs. III–IV)                     | 2.676      | 1.488–4.812  | 3.289 | 0.001*     | 2.32104      | 1.281–4.204   | 2.778  | 0.005*     |
| <i>BRCA</i> (Mutant vs. Wild)               | 2.236      | 1.098–4.551  | 2.218 | 0.026*     | 2.70652      | 1.092–6.707   | 2.15   | 0.032*     |
| HRD (Positive vs. Negative)                 | 1.497      | 1.102–2.034  | 2.58  | 0.010*     | 3.16161      | 0.748–13.359  | 1.566  | 0.117      |
| <i>BRCA</i> +HRD<br>(Positive vs. Negative) | 1.489      | 1.096–2.022  | 2.544 | 0.011*     | 0.38607      | 0.089–1.673   | -1.272 | 0.203      |
| PathoRiCH<br>(Favorable vs. Poor)           | 2.447      | 1.733–3.456  | 5.084 | 3.70E-07** | 2.04982      | 1.441–2.916   | 3.991  | 6.57E-05** |
| SMC cohort                                  |            |              |       |            |              |               |        |            |
| Age (<60 vs. ≥60)                           | 1.038      | 0.6133–1.758 | 0.14  | 0.889      | 0.86         | 0.5047–1.466  | -0.554 | 0.579      |
| FIGO Stage (I–II vs. III–IV)                | 6.018      | 1.871–19.36  | 3.011 | 0.003*     | 5.6049       | 1.7367–18.088 | 2.883  | 0.004*     |
| <i>BRCA</i> (Mutant vs. Wild)               | 2.625      | 1.126–6.122  | 2.234 | 0.026*     | 2.2033       | 0.9414–5.157  | 1.821  | 0.069      |
| PathoRiCH (Favorable vs. Poor)              | 1.885      | 1.074–3.307  | 2.208 | 0.027*     | 1.8233       | 1.0317–3.222  | 2.067  | 0.038*     |

110 CI, confidence interval; HR, hazard ratio; HRD, homologous recombination deficiency

111 Two-sided unpaired t-tests, Mann–Whitney U tests, and Wilcoxon rank-sum tests were employed for analysis

112 \*  $p < 0.05$ ; \*\*  $p < 0.0001$

113 **Supplementary Table 5.** Clustering analyses of high-scoring patches for the PathoRiCH-  
 114 predicted favorable and poor response groups

| Clusters                       | Patch proportion (N of patches) |                   |
|--------------------------------|---------------------------------|-------------------|
|                                | Favorable                       | Poor              |
| F1 (favorable patches >90%)    | 90.5% (1268/1401)               | 9.5% (133/1401)   |
| F2 (favorable patches 80%–90%) | 83.9% (397/473)                 | 16.1% (76/473)    |
| M1 (mixed patches)             | 76.1% (648/852)                 | 23.9% (204/852)   |
| M2 (mixed patches)             | 66.9% (445/665)                 | 33.1% (220/665)   |
| M3 (mixed patches)             | 60.4% (297/492)                 | 39.6% (195/492)   |
| P2 (poor patches 80%–90%)      | 19.5% (176/903)                 | 80.5% (727/903)   |
| P1 (poor patches >90%)         | 9.8% (166/1687)                 | 90.2% (1521/1687) |

115 N, number



116 **Supplementary Table 6. Correlation of the ground truth and predicted platinum-**  
 117 **treatment response groups in the external (TCGA) cohort with available RNAseq**  
 118 **results**

|              |           | Predicted                               |                                    | Total |
|--------------|-----------|-----------------------------------------|------------------------------------|-------|
|              |           | Favorable                               | Poor                               |       |
| Ground truth | Favorable | True favorable-predicted<br>134 (84.4%) | False poor-predicted<br>30 (61.2%) | 164   |
|              | Poor      | False favorable-predicted<br>25 (15.6%) | True poor-predicted<br>19 (38.8%)  | 44    |
| Total        |           | 159                                     | 49                                 | 208   |

119

120 **Supplementary Table 7. Performance of multiple-instance learning models in predicting**  
121 ***BRCA* mutations**

---

|           | <i>BRCA</i> mutation status<br>Cancer-segmented area MIL |       |            |
|-----------|----------------------------------------------------------|-------|------------|
|           | 5×                                                       | 20×   | Multiscale |
| AUC-ROC   | 0.525                                                    | 0.526 | 0.456      |
| Precision | 0.934                                                    | 0.949 | 0.944      |
| Recall    | 0.598                                                    | 0.349 | 0.036      |
| F1 Score  | 0.731                                                    | 0.511 | 0.069      |

---

122 AUC-ROC, area under the receiver operating characteristic curve; MIL, multiple instance learning  
123

124 **Supplementary Table 8. Performance of multiple-instance learning models in predicting homologous recombination deficiency**

|           | HRD status (TCGA 8:2 split for training and test) |       |            |                                          |       |            |                                         |       |            |
|-----------|---------------------------------------------------|-------|------------|------------------------------------------|-------|------------|-----------------------------------------|-------|------------|
|           | HRD status (Telli et al. <sup>2</sup> )           |       |            | HRD status (Takaya et al. <sup>3</sup> ) |       |            | HRD status (Perez et al. <sup>4</sup> ) |       |            |
|           | 5×                                                | 20×   | Multiscale | 5×                                       | 20×   | Multiscale | 5×                                      | 20×   | Multiscale |
| AUC-ROC   | 0.524                                             | 0.484 | 0.451      | 0.469                                    | 0.556 | 0.514      | 0.357                                   | 0.171 | 0.407      |
| Precision | 0.9                                               | 0.742 | 0.648      | 0.714                                    | 0.75  | 0.586      | 1                                       | 1     | 0.871      |
| Recall    | 0.148                                             | 0.383 | 0.968      | 0.189                                    | 0.226 | 0.32       | 0.036                                   | 0.036 | 0.964      |
| F1 Score  | 0.254                                             | 0.505 | 0.776      | 0.299                                    | 0.348 | 0.415      | 0.069                                   | 0.069 | 0.915      |

125 AUC-ROC, area under the receiver operating characteristic curve; HRD, homologous recombination deficiency

126

127 **Supplementary Table 9. Previously published studies on histology-based prediction models for high-grade serous ovarian**  
 128 **carcinoma prognosis using machine/deep learning**

| Publish date (Author)                    | Model                                                                                                                                                                                                                                                                        | Training cohort                                                     | Internal validation cohort                                                                           | External validation cohort                                     | Performance                                                               | Prediction                                           | Limitation                                                                                                      |
|------------------------------------------|------------------------------------------------------------------------------------------------------------------------------------------------------------------------------------------------------------------------------------------------------------------------------|---------------------------------------------------------------------|------------------------------------------------------------------------------------------------------|----------------------------------------------------------------|---------------------------------------------------------------------------|------------------------------------------------------|-----------------------------------------------------------------------------------------------------------------|
| 2020 (Yu <i>et al.</i> ) <sup>5</sup>    | VGGNet CNN architecture pretrained with ImageNet dataset                                                                                                                                                                                                                     | Patient n = 221<br>WSI n = unknown<br>(TCGA)                        | Patient n = 56<br>WSI n = unknown<br>(with 5-fold cross-validation)<br>(TCGA)                        | Not done                                                       | $p = 0.003^*$                                                             | Platinum-free interval (PFI) prediction (regression) | - Included all serous ovarian adenocarcinoma (including low-grade serous carcinoma)<br>- No external validation |
| 2021 (Laury <i>et al.</i> ) <sup>6</sup> | Weakly supervised CNN with multiple label-revision steps by pathologists<br>1. Weakly supervised tumor segmentation CNN using patient outcome<br>2. Supervised learning based on hard labels (the output of weakly supervised tumor segmentation CNN) for digital biomarkers | Patient n = 30<br>WSI n = 205<br>(single institution)               | Patient n = 22<br>WSI n = 22<br>(Single institution)                                                 | Not done                                                       | Sensitivity: 73%<br>Specificity: 91%<br>PPV: 89%<br>Overall accuracy: 82% | PFI prediction                                       | - Small sample size<br>- No external validation                                                                 |
| 2021 (Zeng <i>et al.</i> ) <sup>7</sup>  | 1. Cellular/tissue feature extraction using CellProfiler<br>2. Machine learning classifiers for prediction of molecular features<br>3. Multi-omics model for survival analysis                                                                                               | Patient n = 115<br>WSI n = unknown<br>(TCGA)                        | Patient n = 114<br>WSI n = unknown<br>(TCGA)                                                         | Patient n = 92<br>TMA core n = unknown<br>(single institution) | AUC = 0.703                                                               | 5-year overall survival (OS) prediction              | - Quantitative features were extracted                                                                          |
| 2022 (Boehm <i>et al.</i> ) <sup>8</sup> | 1. Cell-type feature extraction using QuPath<br>2. Resnet-18 CNN pretrained on ImageNet for tissue-type classification and extracting tissue-type features<br>3. Multimodal models integrated with histopathological, radiomic, genomic, and clinical data                   | Patient n = 243<br>WSI n = unknown<br>(TCGA and single institution) | Patient n = 40<br>WSI n = unknown<br>(with 4-fold cross-validation)<br>(TCGA and single institution) | Not done                                                       | C-Index = 0.54                                                            | OS prediction (regression)                           | - Histopathological image features were extracted<br>- No external validation                                   |
| 2022 (Wang <i>et al.</i> ) <sup>9</sup>  | 1. Weakly supervised ROI sampling CNN based on FCN<br>2. Inception V3 CNN for tile-based predictions on probabilities in treatment effectiveness                                                                                                                             | Patient n = 187<br>WSI n = 187<br>(multi-institution)               | Patient n = 101<br>WSI n = 101<br>(with 5-fold cross-validation)<br>(multi-institution)              | Patient n = 71<br>TMA core n = 135<br>(institution unknown)    | AUC = 0.933                                                               | Bevacizumab treatment response                       | - Limited to Bevacizumab treatment response<br>- TMA for external validation                                    |

CNN, convolutional neural network; PPV, positive predictive value; ROI, region of interest; TMA, tissue microarray

\* No other performance metrics were provided.



131 **References:**

- 132 1. Yu, G., Wang, L.-G., Han, Y. & He, Q.-Y. clusterProfiler: an R Package for Comparing Biological Themes Among Gene Clusters.  
133 *OMICS J. Integr. Biol.* **16**, 284–287 (2012).
- 134 2. Telli, M. L. *et al.* Homologous recombination deficiency (HRD) status predicts response to standard neoadjuvant chemotherapy in  
135 patients with triple-negative or BRCA1/2 mutation-associated breast cancer. *Breast Cancer Res. Treat.* **168**, 625–630 (2018).
- 136 3. Takaya, H., Nakai, H., Takamatsu, S., Mandai, M. & Matsumura, N. Homologous recombination deficiency status-based  
137 classification of high-grade serous ovarian carcinoma. *Sci. Rep.* **10**, 2757 (2020).
- 138 4. Perez-Villatoro, F. *et al.* Optimized detection of homologous recombination deficiency improves the prediction of clinical  
139 outcomes in cancer. *Npj Precis. Oncol.* **6**, 1–13 (2022).
- 140 5. Yu, K.-H. *et al.* Deciphering serous ovarian carcinoma histopathology and platinum response by convolutional neural networks.  
141 *BMC Med.* **18**, 236 (2020).
- 142 6. Laury, A. R., Blom, S., Ropponen, T., Virtanen, A. & Carpén, O. M. Artificial intelligence-based image analysis can predict  
143 outcome in high-grade serous carcinoma via histology alone. *Sci. Rep.* **11**, 19165 (2021).
- 144 7. Zeng, H., Chen, L., Zhang, M., Luo, Y. & Ma, X. Integration of histopathological images and multi-dimensional omics analyses  
145 predicts molecular features and prognosis in high-grade serous ovarian cancer. *Gynecol. Oncol.* **163**, 171–180 (2021).
- 146 8. Boehm, K. M. *et al.* Multimodal data integration using machine learning improves risk stratification of high-grade serous ovarian  
147 cancer. *Nat. Cancer* **3**, 723–733 (2022).
- 148 9. Wang, C.-W. *et al.* Weakly supervised deep learning for prediction of treatment effectiveness on ovarian cancer from  
149 histopathology images. *Comput. Med. Imaging Graph.* **99**, 102093 (2022).
- 150
