# Supplementary material for: Histopathologic image–based deep learning classifier for predicting platinum-based treatment responses in high-grade serous ovarian cancer
Source: PubMed Central journal article supplement (PMC11102549; doi:10.1038/s41467-024-48667-6), 2024-05-18
Supplement: 41467_2024_48667_MOESM3_ESM.pdf [file 41467_2024_48667_MOESM3_ESM.pdf]

**Description of Additional Supplementary Files**

1  
2  
3  
4  
5  
6  
7  
8  
9  
10  
11

**Supplementary Data 1:** Differentially expressed genes comparing the true and false favorable-predicted response groups.

**Supplementary Data 2:** Differentially expressed genes comparing the true and false poor-predicted response groups.

**Supplementary Data 3:** Differentially expressed genes comparing the ground truth favorable and poor response groups.
